# Supplementary material
Source: publisher figshare collection journal article supplement (https://gsapubs.figshare.com/ndownloader/files/23296877)
Supplement: Supplementary file 1 [file 23296877]

**Table 1. Results from Point Counts (1 of 5)**

| Oriflamme Canyon pluton |          |                 |          |                 |          |                 |          |                 |         |                 |          |                 |          |                 | Rattlesnake Valley pluton |                 |           |                 |
|-------------------------|----------|-----------------|----------|-----------------|----------|-----------------|----------|-----------------|---------|-----------------|----------|-----------------|----------|-----------------|---------------------------|-----------------|-----------|-----------------|
| Sample <sup>1</sup>     | CBT-1-09 |                 | CBT-1-09 |                 | OF-15-05 |                 | OF-04-05 |                 | OF-8-05 |                 | OF-14-05 |                 | OF-12-05 |                 | OF-06-05                  |                 | CBT 2A-09 |                 |
| Mineral                 | %        | ct <sup>2</sup> | %       | ct <sup>2</sup> | %        | ct <sup>2</sup> | %        | ct <sup>2</sup> | %                         | ct <sup>2</sup> | %         | ct <sup>2</sup> |
| Quartz                  | 41.3     | 12              | 33.3     | 10              | 17       | 51              | 35.6     | 10              | 48.3    | 14              | 27.6     | 83              | 24.6     | 74              | 28.3                      | 85              | 19.2      | 55              |
| K-feldspar              | 7.3      | 22              | 18.3     | 55              | 20       | 60              | 19.3     | 58              | 5.3     | 16              | 10.3     | 31              | 12       | 36              | 15                        | 45              | 23.5      | 67              |
| Plagioclase             | 40.6     | 12              | 34.6     | 10              | 51       | 15              | 27.3     | 82              | 28.3    | 85              | 44.3     | 13              | 49.6     | 14              | 46.6                      | 14              | 48        | 137             |
| Biotite                 | 10.0     | 30              | 12.6     | 38              | 12       | 36              | 15.3     | 46              | 12.6    | 38              | 16       | 48              | 12.6     | 38              | 7.6                       | 23              | 0         | 0               |
| Muscovite               | 0        | 0               | 0        | 0               | 0        | 0               | 0        | 0               | 0       | 0               | 0        | 0               | 0        | 0               | 0.3                       | 1               | 8         | 23              |
| Garnet                  | 0        | 0               | 0        | 0               | 0        | 0               | 0        | 0               | 0       | 0               | 0        | 0               | 0.6      | 2               | 0                         | 0               | 0.3       | 1               |
| Hematitic stain         | 0.3      | 1               | 0        | 0               | 0        | 0               | 0        | 0               | 0       | 0               | 0        | 0               | 0        | 0               | 0                         | 0               | 0.3       | 1               |
| Opaque                  | 0        | 0               | 1        | 3               | 0        | 0               | 0        | 0               | 0       | 0               | 0        | 0               | 0        | 0               | 0                         | 0               | 0         | 0               |
| Hornblende              | 0        | 0               | 0        | 0               | 0        | 0               | 2.3      | 7               | 5.3     | 16              | 1.6      | 5               | 0.3      | 1               | 2                         | 6               | 0         | 0               |
| Chlorite                | 0        | 0               | 0        | 0               | 0        | 0               | 0        | 0               | 0       | 0               | 0        | 0               | 0        | 0               | 0                         | 0               | 0         | 0               |

<sup>1</sup>Locations provided in Table 2

<sup>2</sup> Number of points counted

**Table 1. Results from Point-Counts (continued 2 of 5)**

| Rattlesnake Valley pluton |           |                 |           |                 |          |                 |          |                 |          |                 |          |                 |          |                 |          |                 |          |                 |
|---------------------------|-----------|-----------------|-----------|-----------------|----------|-----------------|----------|-----------------|----------|-----------------|----------|-----------------|----------|-----------------|----------|-----------------|----------|-----------------|
| Sample <sup>1</sup>       | CBT-2A-09 |                 | CBT 2B-09 |                 | CBT 3-09 |                 | CBT 4-09 |                 | CBT 5-09 |                 | CBT-6-09 |                 | CBT 7-09 |                 | CBT-8-09 |                 | CBT 9-09 |                 |
| Mineral                   | %         | ct <sup>2</sup> | %         | ct <sup>2</sup> | %        | ct <sup>2</sup> | %        | ct <sup>2</sup> | %        | ct <sup>2</sup> | %        | ct <sup>2</sup> | %        | ct <sup>2</sup> | %        | ct <sup>2</sup> | %        | ct <sup>2</sup> |
| Quartz                    | 23.3      | 70              | 28.9      | 83              | 43       | 129             | 30.3     | 91              | 31.3     | 94              | 43       | 129             | 22.6     | 68              | 37.3     | 112             | 37       | 111             |
| K-feldspar                | 26.3      | 79              | 21.2      | 61              | 15.3     | 46              | 23       | 69              | 21.3     | 64              | 15.3     | 46              | 26.3     | 79              | 20.6     | 62              | 19       | 57              |
| Plagioclase               | 42.3      | 127             | 39.3      | 113             | 29.3     | 88              | 36.6     | 110             | 41.0     | 123             | 29.3     | 88              | 40.3     | 121             | 33.3     | 100             | 35.6     | 107             |
| Biotite                   | 0         | 0               | 2.7       | 8               | 2        | 6               | 2.6      | 8               | 1        | 3               | 2        | 6               | 2        | 6               | 1.6      | 5               | 1        | 3               |
| Muscovite                 | 7         | 21              | 6.6       | 19              | 10       | 30              | 6.6      | 20              | 5        | 15              | 10       | 30              | 8        | 24              | 6.3      | 19              | 7        | 21              |
| Garnet                    | 0.3       | 1               | 0.3       | 1               | 0        | 0               | 0.6      | 2               | 0        | 0               | 0        | 0               | 0.6      | 2               | 0.6      | 2               | 0.3      | 1               |
| Hematitic stain           | 0.3       | 1               | 0.6       | 2               | 0        | 0               | 0        | 0               | 0        | 0               | 0        | 0               | 0        | 0               | 0        | 0               | 0        | 0               |
| Opaque                    | 0.3       | 1               | 0         | 0               | 0.3      | 1               | 0        | 0               | 0        | 0               | 0.3      | 1               | 0        | 0               | 0        | 0               | 0        | 0               |
| Hornblende                | 0         | 0               | 0         | 0               | 0        | 0               | 0        | 0               | 0        | 0               | 0        | 0               | 0        | 0               | 0        | 0               | 0        | 0               |
| Chlorite                  | 0         | 0               | 0         | 0               | 0        | 0               | 0        | 0               | 0        | 0               | 0        | 0               | 0        | 0               | 0        | 0               | 0        | 0               |

<sup>1</sup>Locations provided in Table 2

<sup>2</sup>number of points counted

**Table 1. Results from Point-Counts (continued 3 of 5)**

| Rattlesnake Valley pluton |          |                 |           |                 |           |                 |           |                 |           |                 |           |                 |           |                 |           |                 |           |                 |
|---------------------------|----------|-----------------|-----------|-----------------|-----------|-----------------|-----------|-----------------|-----------|-----------------|-----------|-----------------|-----------|-----------------|-----------|-----------------|-----------|-----------------|
| Sample <sup>1</sup>       | CBT 9-09 |                 | CBT-10-09 |                 | CBT-11-09 |                 | CBT-12-09 |                 | CBT-14-09 |                 | CBT-15-09 |                 | CBT-16-09 |                 | CBT-17-09 |                 | CBT-20-09 |                 |
| Mineral                   | %        | ct <sup>2</sup> | %         | ct <sup>2</sup> | %         | ct <sup>2</sup> | %         | ct <sup>2</sup> | %         | ct <sup>2</sup> | %         | ct <sup>2</sup> | %         | ct <sup>2</sup> | %         | ct <sup>2</sup> | %         | ct <sup>2</sup> |
| Quartz                    | 31.6     | 95              | 35.3      | 106             | 44.6      | 134             | 25.3      | 76              | 37        | 111             | 39        | 117             | 27.7      | 101             | 32.3      | 97              | 48.3      | 145             |
| K-feldspar                | 25       | 75              | 16.6      | 50              | 18        | 54              | 16.3      | 49              | 12.6      | 38              | 20.3      | 61              | 36.4      | 27              | 22        | 66              | 12.3      | 37              |
| Plagioclase               | 29.6     | 89              | 36.3      | 109             | 34        | 102             | 52        | 156             | 45.6      | 137             | 34.6      | 104             | 9.7       | 76              | 34.3      | 103             | 27.3      | 82              |
| Biotite                   | 1.6      | 5               | 0.3       | 1               | 0         | 0               | 1         | 3               | 0         | 0               | 0.3       | 1               | 27.4      | 7               | 0.6       | 2               | 1.6       | 5               |
| Muscovite                 | 10.3     | 31              | 10.6      | 32              | 3.3       | 10              | 5.3       | 16              | 4.6       | 14              | 5.3       | 16              | 2.5       | 62              | 9.6       | 29              | 9.6       | 29              |
| Garnet                    | 0.6      | 2               | 0.3       | 1               | 0         | 0               | 0         | 0               | 0         | 0               | 0         | 0               | 22.3      | 4               | 1         | 3               | 0.6       | 2               |
| Hematitic stain           | 1        | 3               | 0         | 0               | 0         | 0               | 0         | 0               | 0         | 0               | 0         | 0               | 1.4       | 0               | 0         | 0               | 0         | 0               |
| Opaque                    | 0        | 0               | 0         | 0               | 0         | 0               | 0         | 0               | 0         | 0               | 0         | 0               | 0         | 0               | 0         | 0               | 0         | 0               |
| Hornblende                | 0        | 0               | 0         | 0               | 0         | 0               | 0         | 0               | 0         | 0               | 0         | 0               | 0         | 0               | 0         | 0               | 0         | 0               |
| Chlorite                  | 0        | 0               | 0         | 0               | 0         | 0               | 0         | 0               | 0         | 0               | 0         | 0               | 0         | 0               | 0         | 0               | 0         | 0               |

<sup>1</sup>Locations provided in Table 2

<sup>2</sup> number of points counted

**Table 1. Results from Point-Counts (continued 4 of 5)**

| Rattlesnake Valley pluton |           |                 |           |                 |           |                 |           |                 |           |                 |           |                 |      |                 |      |                 |      |                 |
|---------------------------|-----------|-----------------|-----------|-----------------|-----------|-----------------|-----------|-----------------|-----------|-----------------|-----------|-----------------|------|-----------------|------|-----------------|------|-----------------|
| Sample <sup>1</sup>       | CBT-22-09 |                 | CBT-23-09 |                 | CBT-24-09 |                 | CBT-25-09 |                 | CBT-26-09 |                 | CBT-31-09 |                 | KC-2 |                 | BT-1 |                 | MS-1 |                 |
| Mineral                   | %         | ct <sup>2</sup> | %    | ct <sup>2</sup> | %    | ct <sup>2</sup> | %    | ct <sup>2</sup> |
| Quartz                    | 30.3      | 91              | 25.1      | 111             | 40.3      | 121             | 30.6      | 92              | 30.3      | 91              | 33.6      | 101             | 45.6 | 137             | 45.3 | 136             | 35   | 105             |
| K-feldspar                | 16        | 48              | 44.2      | 32              | 17.6      | 53              | 22.3      | 67              | 25.6      | 77              | 22.6      | 68              | 9    | 27              | 13.6 | 41              | 21.6 | 65              |
| Plagioclase               | 40.6      | 122             | 12.7      | 74              | 35        | 105             | 40.6      | 122             | 36.3      | 109             | 33.6      | 101             | 36.3 | 109             | 31.3 | 94              | 33.3 | 100             |
| Biotite                   | 3         | 9               | 29.4      | 7               | 1         | 3               | 2         | 6               | 1         | 3               | 0.6       | 2               | 6.3  | 19              | 4.6  | 14              | 1    | 3               |
| Muscovite                 | 10        | 30              | 2.7       | 23              | 5.3       | 16              | 3.3       | 10              | 5.6       | 17              | 9         | 27              | 2.6  | 8               | 5    | 14              | 8    | 24              |
| Garnet                    | 0         | 0               | 9.1       | 0               | 0.6       | 2               | 1         | 3               | 1         | 3               | 0.3       | 1               | 0    | 0               | 0    | 0               | 1    | 3               |
| Hematitic stain           | 0         | 0               | 0         | 0               | 0         | 0               | 0         | 0               | 0         | 0               | 0         | 0               | 0    | 0               | 0    | 0               | 0    | 0               |
| Opaque                    | 0         | 0               | 0         | 0               | 0         | 0               | 0         | 0               | 0         | 0               | 0         | 0               | 0    | 0               | 0    | 0               | 0    | 0               |
| Hornblende                | 0         | 0               | 0         | 0               | 0         | 0               | 0         | 0               | 0         | 0               | 0         | 0               | 0    | 0               | 0    | 0               | 0    | 0               |
| Chlorite                  | 0         | 0               | 0         | 0               | 0         | 0               | 0         | 0               | 0         | 0               | 0         | 0               | 0    | 0               | 0    | 0               | 0    | 0               |

<sup>1</sup>Locations provided in Table 2<sup>2</sup> number of points counted

**Table 1. Results from Point-Counts (continued 5 of 5)**

| Rattlesnake Valley pluton |      |                 |      |                 |      |                 |          |                 |      |                 |          |                 |          |                 |      |                 |
|---------------------------|------|-----------------|------|-----------------|------|-----------------|----------|-----------------|------|-----------------|----------|-----------------|----------|-----------------|------|-----------------|
| Sample <sup>1</sup>       | JV-1 |                 | JJ-2 |                 | SP-1 |                 | LP-526-2 |                 | BT-3 |                 | LP-527-1 |                 | LP-526-5 |                 | RM-2 |                 |
| Mineral                   | %    | ct <sup>2</sup> | %    | ct <sup>2</sup> | %    | ct <sup>2</sup> | %        | ct <sup>2</sup> | %    | ct <sup>2</sup> | %        | ct <sup>2</sup> | %        | ct <sup>2</sup> | %    | ct <sup>2</sup> |
| Quartz                    | 40.6 | 122             | 27.6 | 83              | 20.3 | 61              | 33.3     | 100             | 30.6 | 2               | 27.6     | 83              | 22.6     | 68              | 31.6 | 95              |
| K-feldspar                | 16   | 48              | 21.6 | 65              | 10   | 30              | 13       | 39              | 17   | 51              | 23       | 69              | 31       | 93              | 11.6 | 35              |
| Plagioclase               | 35.6 | 107             | 39.6 | 119             | 55.6 | 167             | 43.3     | 130             | 39.3 | 118             | 35       | 105             | 37.6     | 113             | 45.3 | 136             |
| Biotite                   | 1.3  | 4               | 1.6  | 5               | 11.3 | 34              | 6.6      | 20              | 9.3  | 28              | 10.3     | 31              | 0.3      | 1               | 9.6  | 29              |
| Muscovite                 | 6    | 18              | 8    | 24              | 2.3  | 7               | 3        | 9               | 3.6  | 11              | 4        | 12              | 7.3      | 22              | 0.6  | 2               |
| Garnet                    | 0.3  | 1               | 1.3  | 4               | 0.3  | 1               | 0.6      | 2               | 0    | 0               | 0        | 0               | 1        | 3               | 0    | 0               |
| Hematitic stain           | 0    | 0               | 0    | 0               | 0    | 0               | 0        | 0               | 0    | 0               | 0        | 0               | 0        | 0               | 0    | 0               |
| Opaque                    | 0    | 0               | 0    | 0               | 0    | 0               | 0        | 0               | 0    | 0               | 0        | 0               | 0        | 0               | 0    | 0               |
| Hornblende                | 0    | 0               | 0    | 0               | 0    | 0               | 0        | 0               | 0    | 0               | 0        | 0               | 0        | 0               | 0    | 0               |
| Chlorite                  | 0    | 0               | 0    | 0               | 0    | 0               | 0        | 0               | 0    | 0               | 0        | 0               | 0        | 0               | 1    | 3               |

<sup>1</sup>Locations provided in Table 2<sup>2</sup>number of points counted
