# Supplementary material
Source: publisher figshare collection journal article supplement (https://gsapubs.figshare.com/ndownloader/files/23296877)
Supplement: Supplementary file 2 [file 23296877]

**Table 2. Results from Major and Trace Element XRF Analyses (1 of 6)<sup>1</sup>**

| Sample                         | L5P-526-1 | L5P-526-2 | L5P-526-3 | L5P-526-5 | L5P-601-1 | L5P-BT1  | L5P-BT2  | L5P-BT3  | L5P-DD1  | L5P-DD2  | L5P-DMV1 | L5P-DMV2 | L5P-DMV3 |
|--------------------------------|-----------|-----------|-----------|-----------|-----------|----------|----------|----------|----------|----------|----------|----------|----------|
| Latitude                       | 32.9487   | 32.9486   | 32.9485   | 32.9486   | 32.9551   | 32.9666  | 32.9590  | 32.9340  | 32.9673  | 32.9305  | 32.9651  | 32.9597  | 32.9336  |
| Longitude                      | 116.5097  | 116.5095  | 116.5089  | 116.5078  | 116.5305  | 116.5192 | 116.5121 | 116.5143 | 116.5188 | 116.5134 | 116.5182 | 116.5115 | 116.5141 |
| Rattlesnake Valley pluton      |           |           |           |           |           |          |          |          |          |          |          |          |          |
| SiO <sub>2</sub>               | 71.8      | 72.0      | 75.6      | 74.6      | 74.9      | 73.8     | 75.1     | 73.7     | 73.8     | 74.7     | 71.7     | 74.9     | 70.2     |
| Al <sub>2</sub> O <sub>3</sub> | 15.1      | 15.0      | 13.6      | 14.7      | 13.9      | 14.7     | 14.0     | 14.1     | 14.2     | 14.6     | 15.2     | 14.4     | 15.4     |
| FeO*                           | 1.98      | 2.11      | 0.95      | 0.84      | 1.06      | 1.23     | 1.00     | 1.95     | 0.93     | 0.91     | 1.93     | 0.92     | 1.91     |
| CaO                            | 2.30      | 2.20      | 0.61      | 0.43      | 0.93      | 1.08     | 0.82     | 1.99     | 1.14     | 0.44     | 2.23     | 0.39     | 2.18     |
| MgO                            | 0.57      | 0.62      | 0.09      | 0.06      | 0.06      | 0.24     | 0.12     | 0.58     | 0.18     | 0.07     | 0.58     | 0.06     | 0.59     |
| K <sub>2</sub> O               | 2.77      | 2.69      | 4.45      | 4.40      | 3.58      | 3.97     | 3.74     | 2.74     | 3.52     | 4.13     | 3.04     | 3.96     | 3.13     |
| Na <sub>2</sub> O              | 3.88      | 3.92      | 3.49      | 3.95      | 4.36      | 3.88     | 3.91     | 3.61     | 3.96     | 3.91     | 3.86     | 4.20     | 3.97     |
| MnO                            | 0.08      | 0.08      | 0.09      | 0.09      | 0.07      | 0.08     | 0.07     | 0.07     | 0.07     | 0.09     | 0.07     | 0.09     | 0.07     |
| TiO <sub>2</sub>               | 0.19      | 0.20      | 0.04      | 0.02      | 0.03      | 0.08     | 0.04     | 0.19     | 0.06     | 0.02     | 0.19     | 0.02     | 0.19     |
| P <sub>2</sub> O <sub>5</sub>  | 0.13      | 0.12      | 0.06      | 0.07      | 0.05      | 0.10     | 0.07     | 0.08     | 0.09     | 0.08     | 0.09     | 0.10     | 0.09     |
| LOI                            | 0.56      | 0.61      | 0.53      | 0.77      | 0.22      | 0.68     | 0.55     | 0.57     | 0.55     | 0.84     | 0.45     | 0.66     | 0.49     |
| Total                          | 99.36     | 99.55     | 99.51     | 99.93     | 99.16     | 99.84    | 99.42    | 99.58    | 98.50    | 99.79    | 99.34    | 99.70    | 98.22    |
| Sc                             | 4         | 4         | 2         | 1         | b.d.      | 2        | 1        | 4        | 2        | 1        | 3        | 1        | 5        |
| V                              | 20        | 22        | 4         | 2         | 3         | 10       | 5        | 22       | 9        | 3        | 20       | 3        | 24       |
| Cr                             | 30        | 12        | 28        | 25        | 19        | 35       | 23       | 20       | 19       | 9        | 32       | 30       | 28       |
| Co                             | 46        | 51        | 61        | 50        | 30        | 55       | 62       | 53       | 61       | 61       | 49       | 56       | 57       |
| Cu                             | 4         | 4         | 4         | 4         | 4         | 3        | 3        | 3        | 4        | 3        | 3        | 3        | 3        |
| Zn                             | 37        | 40        | 17        | 26        | 37        | 39       | 33       | 38       | 26       | 22       | 35       | 29       | 26       |
| Rb                             | 95        | 91        | 112       | 171       | 116       | 140      | 114      | 81       | 111      | 159      | 83       | 151      | 94       |
| Sr                             | 215       | 219       | 69        | 38        | 105       | 114      | 93       | 202      | 116      | 40       | 221      | 46       | 228      |
| Y                              | 19        | 19        | 23        | 23        | 18        | 21       | 37       | 20       | 18       | 24       | 19       | 23       | 18       |
| Zr                             | 86        | 91        | 42        | 32        | 47        | 55       | 46       | 88       | 53       | 41       | 87       | 38       | 86       |
| Nb                             | 7         | 8         | 6         | 10        | 10        | 9        | 8        | 7        | 7        | 9        | 7        | 10       | 7        |
| Ba                             | 565       | 533       | 718       | 438       | 825       | 710      | 808      | 593      | 685      | 451      | 599      | 449      | 620      |
| Hf                             | 4         | 3         | 2         | 2         | 2         | 2        | 2        | 3        | 2        | 2        | 4        | 2        | 3        |
| Pb                             | 12        | 10        | 17        | 15        | 15        | 14       | 15       | 10       | 14       | 16       | 12       | 13       | 11       |
| Th                             | 6         | 7         | 5         | 5         | 8         | 7        | 5        | 7        | 5        | 6        | 7        | 5        | 8        |
| U                              | 4         | 1         | 1         | 1         | 1         | b.d.     | 1        | 1        | 1        | 3        | 2        | 1        | 2        |

<sup>1</sup> major elements in wt%; trace elements in ppm; b.d. - below detection; n.a. - not available

Table 2. Results from Major and Trace Element XRF Analyses (continued 2 of 6)<sup>1</sup>

| Sample                         | L5P-EH1  | L5P-EH2  | L5P-EH3  | L5P-EM1  | L5P-EM2  | L5P-EM3  | L5P-JJ1  | L5P-JJ2  | L5P-JV2  | L5P-JV1  | L5P-KC1  | L5P-KC2  |
|--------------------------------|----------|----------|----------|----------|----------|----------|----------|----------|----------|----------|----------|----------|
| Latitude                       | 32.9706  | 32.9607  | 32.9308  | 32.9717  | 32.9637  | 32.9321  | 32.9679  | 32.9595  | 32.9643  | 32.9729  | 32.9696  | 32.9623  |
| Longitude                      | 116.5201 | 116.5129 | 116.5134 | 116.5203 | 116.5176 | 116.5137 | 116.5193 | 116.5116 | 116.5179 | 116.5208 | 116.5198 | 116.5170 |
| Rattlesnake Valley (continued) |          |          |          |          |          |          |          |          |          |          |          |          |
| SiO <sub>2</sub>               | 75.0     | 75.0     | 75.4     | 74.7     | 71.3     | 74.0     | 74.1     | 75.2     | 70.6     | 75.0     | 74.7     | 71.2     |
| Al <sub>2</sub> O <sub>3</sub> | 14.6     | 14.5     | 14.1     | 14.5     | 15.0     | 15.0     | 14.1     | 14.1     | 15.8     | 14.3     | 14.0     | 15.3     |
| FeO*                           | 0.94     | 0.98     | 0.84     | 0.94     | 1.99     | 0.99     | 1.18     | 0.79     | 2.20     | 0.92     | 1.01     | 2.00     |
| CaO                            | 0.47     | 0.43     | 0.47     | 0.35     | 2.02     | 0.69     | 1.00     | 0.43     | 2.41     | 0.30     | 0.53     | 2.19     |
| MgO                            | 0.09     | 0.08     | 0.06     | 0.06     | 0.58     | 0.10     | 0.24     | 0.06     | 0.66     | 0.04     | 0.13     | 0.58     |
| K <sub>2</sub> O               | 4.15     | 3.98     | 4.07     | 4.12     | 2.88     | 4.22     | 3.82     | 4.01     | 2.88     | 4.05     | 3.98     | 2.90     |
| Na <sub>2</sub> O              | 4.05     | 4.17     | 3.84     | 4.17     | 3.72     | 4.04     | 3.66     | 3.97     | 3.94     | 3.95     | 3.81     | 3.96     |
| MnO                            | 0.09     | 0.09     | 0.08     | 0.08     | 0.08     | 0.07     | 0.08     | 0.07     | 0.08     | 0.08     | 0.09     | 0.08     |
| TiO <sub>2</sub>               | 0.02     | 0.02     | 0.02     | 0.02     | 0.19     | 0.04     | 0.08     | 0.02     | 0.21     | 0.01     | 0.03     | 0.19     |
| P <sub>2</sub> O <sub>5</sub>  | 0.07     | 0.08     | 0.07     | 0.08     | 0.10     | 0.06     | 0.09     | 0.09     | 0.09     | 0.08     | 0.08     | 0.13     |
| LOI                            | 0.74     | 0.64     | 0.56     | 0.60     | 0.85     | 0.66     | 0.71     | 0.67     | 0.77     | 0.75     | 0.63     | 0.55     |
| Total                          | 100.22   | 99.97    | 99.51    | 99.62    | 98.71    | 99.87    | 99.06    | 99.41    | 99.64    | 99.48    | 98.99    | 99.08    |
| Sc                             | 1        | 1        | 2        | b.d.     | 5        | 3        | 3        | 1        | 4        | 3        | 2        | 3        |
| V                              | 2        | 3        | 2        | 3        | 23       | 4        | 8        | 4        | 24       | 2        | 3        | 21       |
| Cr                             | 29       | 3        | 18       | 32       | 19       | 14       | 34       | 24       | 26       | 27       | 16       | 26       |
| Co                             | 59       | 60       | 74       | 56       | 72       | 43       | 55       | 67       | 58       | 63       | 60       | 56       |
| Cu                             | 3        | 3        | 3        | 3        | 3        | 3        | 3        | 3        | 3        | 4        | 3        | 3        |
| Zn                             | 41       | 34       | 11       | 41       | 40       | 18       | 36       | 28       | 42       | 31       | 33       | 37       |
| Rb                             | 153      | 165      | 161      | 163      | 97       | 147      | 138      | 142      | 91       | 169      | 146      | 97       |
| Sr                             | 50       | 50       | 40       | 38       | 208      | 75       | 104      | 56       | 238      | 27       | 62       | 220      |
| Y                              | 23       | 24       | 23       | 24       | 19       | 32       | 19       | 21       | 19       | 24       | 21       | 19       |
| Zr                             | 39       | 41       | 36       | 39       | 83       | 42       | 52       | 40       | 88       | 38       | 40       | 88       |
| Nb                             | 10       | 11       | 9        | 10       | 8        | 9        | 8        | 8        | 8        | 12       | 9        | 8        |
| Ba                             | 524      | 459      | 445      | 440      | 602      | 781      | 703      | 611      | 760      | 324      | 605      | 613      |
| Hf                             | 2        | 2        | 2        | 3        | 3        | 2        | 3        | 2        | 4        | 2        | 2        | 3        |
| Pb                             | 15       | 15       | 14       | 15       | 10       | 16       | 14       | 15       | 10       | 15       | 16       | 11       |
| Th                             | 5        | 5        | 5        | 5        | 7        | 5        | 6        | 4        | 8        | 6        | 5        | 7        |
| U                              | 1        | 3        | 2        | 2        | 1        | 3        | 1        | b.d.     | 2        | 2        | b.d.     | 1        |

<sup>1</sup>major elements in wt%; trace elements in ppm; b.d. - below detection; n.a. - not available

Table 2. Results from Major and Trace Element XRF Analyses (continued 3 of 6)<sup>1</sup>

| Sample                         | L5P-KC3  | L5P-MS1  | L5P-MS2  | L5P-RM1  | L5P-RM2  | L5P-SP1  | L5P-SP2  | CBT-02A-09 | CBT-02B-09 | CBT-03-09 | CBT-04-09 | CBT-05-09 |
|--------------------------------|----------|----------|----------|----------|----------|----------|----------|------------|------------|-----------|-----------|-----------|
| Latitude                       | 32.9325  | 32.9691  | 32.9582  | 32.9722  | 32.9616  | 32.9657  | 32.9300  | 32.9580    | 32.9580    | 32.9580   | 32.9582   | 32.9589   |
| Longitude                      | 116.5141 | 116.5193 | 116.5124 | 116.5208 | 116.5155 | 116.5187 | 116.5132 | 116.5111   | 116.5111   | 116.5115  | 116.5124  | 116.5121  |
| Rattlesnake Valley (continued) |          |          |          |          |          |          |          |            |            |           |           |           |
| SiO <sub>2</sub>               | 75.8     | 75.1     | 75.3     | 75.6     | 70.1     | 71.4     | 74.2     | 73.7       | 74.6       | 75.1      | 74.1      | 75.6      |
| Al <sub>2</sub> O <sub>3</sub> | 13.6     | 14.2     | 14.4     | 14.3     | 15.3     | 15.1     | 14.6     | 14.7       | 14.3       | 13.7      | 14.7      | 13.6      |
| FeO*                           | 0.94     | 1.00     | 1.02     | 0.95     | 2.98     | 2.23     | 0.67     | 0.99       | 1.08       | 1.03      | 1.11      | 0.97      |
| CaO                            | 0.61     | 0.48     | 0.66     | 0.28     | 3.03     | 2.28     | 0.32     | 0.46       | 0.47       | 0.80      | 0.65      | 0.49      |
| MgO                            | 0.08     | 0.12     | 0.11     | 0.04     | 1.00     | 0.68     | 0.03     | 0.07       | 0.08       | 0.16      | 0.14      | 0.13      |
| K <sub>2</sub> O               | 3.91     | 3.99     | 4.06     | 4.03     | 2.48     | 2.63     | 4.55     | 4.34       | 4.06       | 3.77      | 4.17      | 4.23      |
| Na <sub>2</sub> O              | 3.77     | 3.59     | 3.81     | 3.96     | 3.71     | 3.88     | 4.13     | 4.35       | 4.24       | 3.80      | 3.96      | 3.28      |
| MnO                            | 0.07     | 0.08     | 0.08     | 0.09     | 0.10     | 0.09     | 0.04     | 0.08       | 0.10       | 0.07      | 0.08      | 0.10      |
| TiO <sub>2</sub>               | 0.03     | 0.03     | 0.04     | 0.01     | 0.32     | 0.21     | 0.01     | 0.02       | 0.03       | 0.05      | 0.04      | 0.03      |
| P <sub>2</sub> O <sub>5</sub>  | 0.09     | 0.04     | 0.14     | 0.08     | 0.14     | 0.10     | 0.06     | 0.08       | 0.09       | 0.07      | 0.05      | 0.08      |
| LOI                            | 0.64     | 0.90     | 0.69     | 0.69     | 0.49     | 0.75     | 0.72     | 0.03       | 0.03       | 0.02      | 0.03      | 0.03      |
| Total                          | 99.54    | 99.53    | 100.31   | 100.03   | 99.65    | 99.35    | 99.33    | 98.77      | 99.05      | 98.54     | 99.04     | 98.53     |
| Sc                             | 1        | b.d.     | 1        | 1        | 6        | 3        | 1        | b.d.       | b.d.       | b.d.      | b.d.      | b.d.      |
| V                              | 4        | 4        | 4        | 2        | 41       | 23       | 2        | b.d.       | b.d.       | b.d.      | b.d.      | b.d.      |
| Cr                             | 23       | 24       | 16       | 21       | 17       | 26       | 19       | 3          | 3          | 4         | 6         | 16        |
| Co                             | 56       | 52       | 56       | 50       | 56       | 50       | 43       | 10         | b.d.       | 18        | b.d.      | 15        |
| Cu                             | 3        | 3        | 4        | 3        | 5        | 4        | 4        | 8          | 8          | 7         | 6         | 7         |
| Zn                             | 26       | 34       | 38       | 33       | 60       | 44       | 11       | 30         | 13         | 41        | 40        | 39        |
| Rb                             | 126      | 145      | 142      | 165      | 73       | 92       | 169      | 165        | 142        | 119       | 145       | 144       |
| Sr                             | 68       | 61       | 76       | 30       | 271      | 221      | 35       | 55         | 54         | 103       | 78        | 64        |
| Y                              | 19       | 20       | 22       | 24       | 21       | 21       | 27       | 22         | 23         | 18        | 23        | 28        |
| Zr                             | 40       | 41       | 45       | 43       | 101      | 91       | 40       | 43         | 43         | 52        | 50        | 52        |
| Nb                             | 8        | 9        | 9        | 10       | 8        | 8        | 8        | 7          | 8          | 6         | 8         | 4         |
| Ba                             | 626      | 676      | 690      | 359      | 569      | 493      | 426      | 496        | 401        | 831       | 658       | 537       |
| Hf                             | 2        | 3        | 2        | 3        | 2        | 4        | 3        | n.a.       | n.a.       | n.a.      | n.a.      | n.a.      |
| Pb                             | 14       | 15       | 15       | 15       | 8        | 11       | 18       | n.a.       | n.a.       | n.a.      | n.a.      | n.a.      |
| Th                             | 5        | 6        | 5        | 5        | 8        | 8        | 4        | n.a.       | n.a.       | n.a.      | n.a.      | n.a.      |
| U                              | 2        | b.d.     | b.d.     | 3        | 2        | 2        | 3        | n.a.       | n.a.       | n.a.      | n.a.      | n.a.      |

<sup>1</sup> major elements in wt%; trace elements in ppm; b.d. - below detection; n.a. - not available

Table 2. Results from Major and Trace Element XRF Analyses (continued 4 of 6)<sup>1</sup>

| Sample                         | CBT-06-09 | CBT-07-09 | CBT-08-09 | CBT-09-09 | CBT-10-09 | CBT-11-09 | CBT-12-09 | CBT-14-09 | CBT-15-09 | CBT-16-09 | CBT-17-09 | CBT-20-09 |
|--------------------------------|-----------|-----------|-----------|-----------|-----------|-----------|-----------|-----------|-----------|-----------|-----------|-----------|
| Latitude                       | 32.9589   | 32.9595   | 32.9597   | 32.9597   | 32.9670   | 32.9666   | 32.9659   | 32.9640   | 32.9628   | 32.9621   | 32.9613   | 32.9583   |
| Longitude                      | 116.5124  | 116.5116  | 116.5115  | 116.5115  | 116.5135  | 116.5136  | 116.5130  | 116.5123  | 116.5119  | 116.5117  | 116.5117  | 116.5111  |
| Rattlesnake Valley (continued) |           |           |           |           |           |           |           |           |           |           |           |           |
| SiO <sub>2</sub>               | 75.1      | 72.8      | 74.7      | 73.8      | 75.8      | 73.0      | 73.9      | 74.6      | 75.5      | 75.6      | 73.5      | 74.7      |
| Al <sub>2</sub> O <sub>3</sub> | 14.0      | 14.2      | 14.1      | 14.7      | 14.0      | 14.3      | 15.1      | 13.8      | 13.9      | 14.9      | 14.4      | 14.3      |
| FeO*                           | 0.91      | 1.00      | 0.93      | 1.02      | 0.83      | 0.84      | 1.02      | 0.76      | 0.98      | 1.11      | 0.93      | 0.56      |
| CaO                            | 0.56      | 0.54      | 0.37      | 0.46      | 0.62      | 0.44      | 0.49      | 0.43      | 0.45      | 0.57      | 0.41      | 0.38      |
| MgO                            | 0.12      | 0.09      | 0.08      | 0.08      | 0.04      | 0.04      | 0.06      | 0.03      | 0.04      | 0.09      | 0.04      | 0.06      |
| K <sub>2</sub> O               | 3.85      | 3.95      | 4.14      | 4.14      | 2.52      | 4.11      | 3.14      | 3.42      | 3.64      | 2.79      | 4.03      | 3.92      |
| Na <sub>2</sub> O              | 3.78      | 4.17      | 4.00      | 4.33      | 4.20      | 4.18      | 4.68      | 4.31      | 4.09      | 2.57      | 4.18      | 4.27      |
| MnO                            | 0.07      | 0.09      | 0.07      | 0.08      | 0.05      | 0.08      | 0.09      | 0.08      | 0.09      | 0.08      | 0.10      | 0.08      |
| TiO <sub>2</sub>               | 0.03      | 0.03      | 0.02      | 0.03      | 0.03      | 0.03      | 0.03      | 0.02      | 0.02      | 0.02      | 0.02      | 0.02      |
| P <sub>2</sub> O <sub>5</sub>  | 0.10      | 0.08      | 0.08      | 0.13      | 0.09      | 0.08      | 0.08      | 0.08      | 0.08      | 0.05      | 0.09      | 0.04      |
| LOI                            | 0.03      | 0.02      | 0.02      | 0.03      | 0.03      | 0.02      | 0.04      | 0.02      | 0.02      | 0.05      | 0.02      | 0.03      |
| Total                          | 98.50     | 96.99     | 98.48     | 98.86     | 98.26     | 97.16     | 98.62     | 97.51     | 98.79     | 97.88     | 97.74     | 98.42     |
| Sc                             | b.d.      |
| V                              | b.d.      |
| Cr                             | 32        | 13        | 24        | 18        | 19        | 18        | 37        | 25        | 40        | 11        | 15        | 4         |
| Co                             | b.d.      | 11        | 9         | 7         | b.d.      | b.d.      | b.d.      | b.d.      | 26        | b.d.      | b.d.      | b.d.      |
| Cu                             | 7         | 7         | 6         | 6         | 5         | 3         | 3         | 4         | 3         | 8         | 3         | 8         |
| Zn                             | 33        | 39        | 37        | 30        | 13        | 22        | 23        | 15        | 36        | 24        | 41        | 11        |
| Rb                             | 133       | 145       | 155       | 156       | 91        | 152       | 130       | 131       | 147       | 91        | 160       | 136       |
| Sr                             | 64        | 58        | 49        | 55        | 46        | 47        | 30        | 40        | 31        | 58        | 23        | 53        |
| Y                              | 17        | 25        | 24        | 24        | 22        | 24        | 20        | 25        | 20        | 19        | 22        | 21        |
| Zr                             | 39        | 47        | 39        | 44        | 41        | 41        | 34        | 34        | 32        | 40        | 34        | 41        |
| Nb                             | 6         | 7         | 9         | 8         | 9         | 9         | 11        | 9         | 8         | 14        | 9         | 8         |
| Ba                             | 460       | 483       | 398       | 503       | 298       | 517       | 134       | 259       | 264       | 359       | 245       | 403       |
| Hf                             | n.a.      |
| Pb                             | n.a.      |
| Th                             | n.a.      |
| U                              | n.a.      |

<sup>1</sup> major elements in wt%; trace elements in ppm; b.d. - below detection; n.a. - not available

Table 2. Results from Major and Trace Element XRF Analyses (continued 5 of 6)<sup>1</sup>

| Sample                         | CBT-22-09 | CBT-23-09 | CBT-24-09 | CBT-25-09 | CBT-26-09 | CBT-31-09 | CBT-01-09 | OF-01-05 | OF-02-05 | OF-03-05 | OF-04-05 | OF-05-05 | OF-06-05 |
|--------------------------------|-----------|-----------|-----------|-----------|-----------|-----------|-----------|----------|----------|----------|----------|----------|----------|
| Latitude                       | 32.95693  | 32.9553   | 32.9487   | 32.9510   | 32.9523   | 32.9307   | 32.9568   | 32.9566  | 32.9678  | 32.9622  | 32.9617  | 32.9721  | 32.9700  |
| Longitude                      | 116.51109 | 116.5104  | 116.5079  | 116.5085  | 116.5093  | 116.5085  | 116.5074  | 116.5042 | 116.5089 | 116.5049 | 116.5071 | 116.5097 | 116.5092 |
| Rattlesnake Valley (continued) |           |           |           |           |           |           |           |          |          |          |          |          |          |
| SiO <sub>2</sub>               | 74.7      | 74.2      | 74.3      | 73.4      | 74.0      | 74.3      | 69.2      | 68.1     | 68.8     | 65.8     | 67.6     | 74.2     | 67.8     |
| Al <sub>2</sub> O <sub>3</sub> | 14.1      | 14.1      | 14.0      | 14.1      | 14.5      | 14.3      | 15.5      | 14.8     | 15.0     | 15.6     | 15.5     | 13.7     | 15.7     |
| FeO*                           | 0.87      | 0.92      | 0.85      | 1.06      | 0.90      | 1.00      | 3.04      | 3.38     | 3.24     | 4.25     | 3.56     | 0.49     | 3.43     |
| CaO                            | 0.76      | 0.49      | 0.50      | 0.52      | 0.48      | 0.36      | 3.16      | 3.48     | 3.16     | 3.70     | 3.42     | 1.09     | 3.62     |
| MgO                            | 0.12      | 0.05      | 0.04      | 0.11      | 0.05      | 0.03      | 0.67      | 0.91     | 0.84     | 1.11     | 0.89     | 0.06     | 0.86     |
| K <sub>2</sub> O               | 3.55      | 3.93      | 4.12      | 4.20      | 4.39      | 4.28      | 2.64      | 2.36     | 3.49     | 2.60     | 3.02     | 5.69     | 2.70     |
| Na <sub>2</sub> O              | 4.22      | 3.92      | 3.96      | 3.81      | 3.89      | 4.18      | 3.52      | 3.53     | 3.11     | 3.43     | 3.34     | 3.01     | 3.43     |
| MnO                            | 0.06      | 0.08      | 0.08      | 0.09      | 0.09      | 0.08      | 0.07      | 0.08     | 0.07     | 0.10     | 0.08     | 0.02     | 0.08     |
| TiO <sub>2</sub>               | 0.05      | 0.03      | 0.02      | 0.04      | 0.02      | 0.02      | 0.34      | 0.39     | 0.38     | 0.49     | 0.41     | 0.04     | 0.40     |
| P <sub>2</sub> O <sub>5</sub>  | 0.07      | 0.08      | 0.08      | 0.08      | 0.08      | 0.08      | 0.07      | 0.10     | 0.10     | 0.12     | 0.12     | 0.05     | 0.12     |
| LOI                            | 0.02      | 0.02      | 0.02      | 0.02      | 0.02      | 0.03      | 0.02      | 2.50     | 1.55     | 2.34     | 1.64     | 1.61     | 1.51     |
| Total                          | 98.61     | 97.76     | 97.99     | 97.36     | 98.45     | 98.62     | 98.21     | 99.61    | 99.64    | 99.53    | 99.60    | 99.95    | 99.61    |
| Sc                             | n.a.      | b.d.      | b.d.      | b.d.      | b.d.      | b.d.      | 6         | 11       | 9        | 13       | 10       | 3        | 12       |
| V                              | n.a.      | b.d.      | b.d.      | b.d.      | b.d.      | b.d.      | 39        | 60       | 59       | 74       | 63       | 8        | 61       |
| Cr                             | n.a.      | 27        | 25        | 21        | 87        | 21        | 7         | 24       | 19       | 30       | 12       | 26       | 4        |
| Co                             | n.a.      | 23        | 32        | 63        | 36        | b.d.      | 20        | 37       | 53       | 46       | 52       | 61       | 54       |
| Cu                             | n.a.      | 3         | 3         | 3         | 3         | 3         | 9         | 4        | 4        | 6        | 8        | 5        | 6        |
| Zn                             | n.a.      | 37        | 21        | 34        | 28        | 18        | 60        | 63       | 56       | 73       | 63       | 8        | 59       |
| Rb                             | n.a.      | 153       | 161       | 162       | 154       | 145       | 91        | 77       | 100      | 97       | 97       | 126      | 89       |
| Sr                             | n.a.      | 47        | 38        | 41        | 36        | 29        | 258       | 223      | 239      | 245      | 250      | 91       | 256      |
| Y                              | n.a.      | 27        | 25        | 28        | 28        | 27        | 21        | 27       | 26       | 33       | 27       | 21       | 28       |
| Zr                             | n.a.      | 43        | 38        | 45        | 39        | 45        | 132       | 127      | 103      | 127      | 117      | 35       | 116      |
| Nb                             | n.a.      | 8         | 7         | 8         | 7         | 9         | 6         | 7        | 7        | 7        | 6        | 5        | 6        |
| Ba                             | n.a.      | 578       | 451       | 493       | 468       | 352       | 1083      | 669      | 1152     | 806      | 1044     | 568      | 974      |
| Hf                             | n.a.      | 4        | 3        | 3        | 3        | 1        | 2        |
| Pb                             | n.a.      | 10       | 10       | 7        | 9        | 32       | 9        |
| Th                             | n.a.      | 8        | 9        | 2        | 7        | 6        | 4        |
| U                              | n.a.      | 4        | 2        | 2        | 2        | 2        | 2        |

<sup>1</sup> major elements in wt%; trace elements in ppm; b.d. - below detection; n.a. - not available

**Table 2. Results from Major and Trace Element XRF Analyses (continued 6 of 6)<sup>1</sup>**

| Sample                         | OF-07-05 | OF-08-05 | OF-09-05 | OF-12-05 | OF-13-05 | OF-14-05 | OF-15-05 |
|--------------------------------|----------|----------|----------|----------|----------|----------|----------|
| Latitude                       | 32.9731  | 32.9685  | 32.9664  | 32.9602  | 32.9601  | 32.9622  | 32.9705  |
| Longitude                      | 116.5089 | 116.5093 | 116.5085 | 116.5050 | 116.5069 | 116.5087 | 116.5017 |
| Oriflamme Canyon pluton        |          |          |          |          |          |          |          |
| SiO <sub>2</sub>               | 73.8     | 68.4     | 67.6     | 67.9     | 66.6     | 67.9     | 70.1     |
| Al <sub>2</sub> O <sub>3</sub> | 13.9     | 15.3     | 15.7     | 14.9     | 15.9     | 15.3     | 14.7     |
| FeO*                           | 0.86     | 3.43     | 3.59     | 3.80     | 3.83     | 3.85     | 2.70     |
| CaO                            | 1.16     | 3.62     | 3.62     | 3.21     | 3.84     | 3.58     | 2.84     |
| MgO                            | 0.21     | 0.87     | 0.94     | 0.96     | 0.98     | 1.01     | 0.66     |
| K <sub>2</sub> O               | 4.51     | 2.70     | 2.63     | 2.86     | 2.60     | 2.54     | 3.72     |
| Na <sub>2</sub> O              | 3.10     | 3.40     | 3.38     | 3.10     | 3.51     | 3.30     | 2.98     |
| MnO                            | 0.02     | 0.07     | 0.07     | 0.10     | 0.08     | 0.08     | 0.06     |
| TiO <sub>2</sub>               | 0.10     | 0.40     | 0.42     | 0.46     | 0.45     | 0.47     | 0.31     |
| P <sub>2</sub> O <sub>5</sub>  | 0.06     | 0.11     | 0.11     | 0.11     | 0.12     | 0.11     | 0.08     |
| LOI                            | 2.20     | 1.27     | 1.59     | 2.13     | 1.66     | 1.47     | 1.59     |
| Total                          | 99.89    | 99.61    | 99.60    | 99.57    | 99.57    | 99.56    | 99.70    |
| Sc                             | 5        | 11       | 11       | 10       | 12       | 11       | 11       |
| V                              | 15       | 62       | 63       | 68       | 69       | 70       | 49       |
| Cr                             | 32       | 27       | 18       | 4        | 5        | 8        | 60       |
| Co                             | 71       | 57       | 55       | 59       | 55       | 83       | 68       |
| Cu                             | 4        | 6        | 7        | 5        | 6        | 7        | 4        |
| Zn                             | 11       | 61       | 60       | 91       | 62       | 70       | 47       |
| Rb                             | 137      | 86       | 87       | 108      | 85       | 92       | 99       |
| Sr                             | 111      | 260      | 260      | 233      | 272      | 255      | 234      |
| Y                              | 26       | 27       | 26       | 31       | 28       | 26       | 23       |
| Zr                             | 57       | 117      | 118      | 124      | 118      | 116      | 89       |
| Nb                             | 7        | 6        | 6        | 7        | 6        | 7        | 5        |
| Ba                             | 929      | 997      | 970      | 1092     | 1016     | 989      | 1219     |
| Hf                             | 2        | 3        | 3        | 4        | 3        | 2        | 2        |
| Pb                             | 34       | 8        | 8        | 7        | 7        | 5        | 10       |
| Th                             | 10       | 6        | 16       | 6        | 5        | 3        | 4        |
| U                              | 1        | 2        | 2        | 1        | 2        | 1        | 1        |

<sup>1</sup> major elements in wt%; trace elements in ppm; b.d. - below detection; n.a. - not available
